# Supplementary material
Source: publisher figshare collection journal article supplement (https://frontiersin.figshare.com/ndownloader/files/32419637)
Supplement: Supplementary file [file 32419637]

## Supplementary Figures

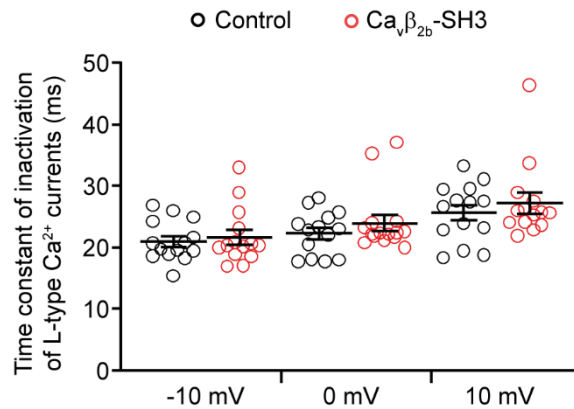

**Supplementary Figure S1. Time constant of inactivation of L-type  $\text{Ca}^{2+}$  currents in adult rat cardiomyocytes expressing  $\text{Ca}_v\beta_{2b}$ -SH3.** Scatter plot showing the time constant ( $\tau$ ) of inactivation of L-type  $\text{Ca}^{2+}$  current at -10, 0 and 10 mV of control (black,  $n=14$ ) and  $\text{Ca}_v\beta_{2b}$ -SH3-expressing (red,  $n=15$ ) cardiomyocytes. Data are presented as mean  $\pm$  SEM.

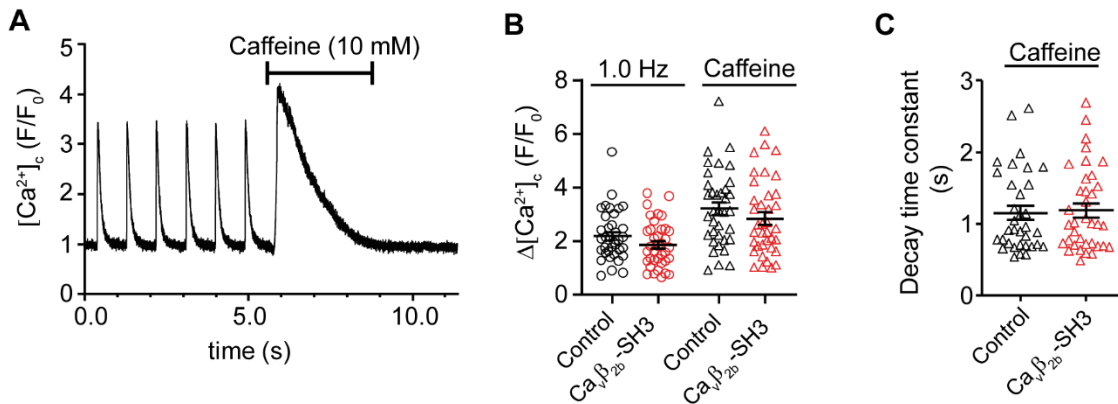

**Supplementary Figure S2. Sarcoplasmic reticulum  $\text{Ca}^{2+}$  content and cytosolic  $\text{Ca}^{2+}$  removal in cardiomyocytes overexpressing the SH3 domain of  $\text{Ca}_v\beta_{2b}$ .** Adult rat cardiomyocytes were paced at 1.0 Hz for 1 minute to establish steady-state contractions. Then, the pacing was paused and the release of the total SR  $\text{Ca}^{2+}$  content was induced by fast perfusion with normal Tyrode's solution supplemented with 1.8 mM  $\text{Ca}^{2+}$  and 10 mM caffeine. (A) Representative fluorescence tracing during the 1.0 Hz pacing and  $\text{Ca}^{2+}$  release induced by application of caffeine. (B)  $\text{Ca}^{2+}$  transient amplitude at 1.0 Hz and SR  $\text{Ca}^{2+}$  content assessed by caffeine-induced  $\text{Ca}^{2+}$  release;  $n=35$  control cells,  $n=37$   $\text{Ca}_v\beta_{2b}$ -SH3-expressing cells. (C) Decay time constant;  $n=34$  control cells,  $n=36$   $\text{Ca}_v\beta_{2b}$ -SH3-expressing cells. Data are presented as mean  $\pm$  SEM.
